# Supplementary material
Source: MDPI journal article supplement (https://www.mdpi.com/2073-4468/13/1/17)
Supplement: s1 [file s1]

## Supporting Information

# Platform-Specific Fc N-Glycan Profiles of an Antisperm Antibody

Ellena Nador <sup>1</sup>, Chaoshuang Xia <sup>2</sup>, Philip J. Santangelo <sup>3</sup>, Kevin J. Whaley <sup>4</sup>, Catherine E. Costello <sup>2,\*</sup> and Deborah J. Anderson <sup>1,\*</sup>

<sup>1</sup> Department of Medicine, Boston University Chobanian & Avedisian School of Medicine, Boston, MA 02118, USA

<sup>2</sup> Center for Biomedical Mass Spectrometry, Boston University Chobanian & Avedisian School of Medicine, Boston, MA 02118, USA

<sup>3</sup> Wallace H. Coulter Department of Biomedical Engineering, Emory University, Atlanta, GA 30322, USA

<sup>4</sup> ZabBio, Inc., San Diego, CA 92121, USA

\* Correspondence: cecmsms@bu.edu (C.E.C.); deborah.anderson@bmc.org (D.J.A.)

Table S1. Protein composition of untransfected VK2 culture supernatant.

| Protein                    | Percentage of total sample | Sequence coverage (%) | Molecular weight of unmodified protein (kDa) |
|----------------------------|----------------------------|-----------------------|----------------------------------------------|
| Serotransferrin            | 97                         | 66                    | 77                                           |
| HCA IgG Lambda Heavy Chain | <1                         | 11.2                  | 48                                           |
| HCA IgG Lambda Light Chain | <1                         | 9.9                   | 26                                           |
| Bovine Serum Albumin       | 1                          | 78.9                  | 66                                           |
| Trypsin                    | 1                          | 20.8                  | 24                                           |

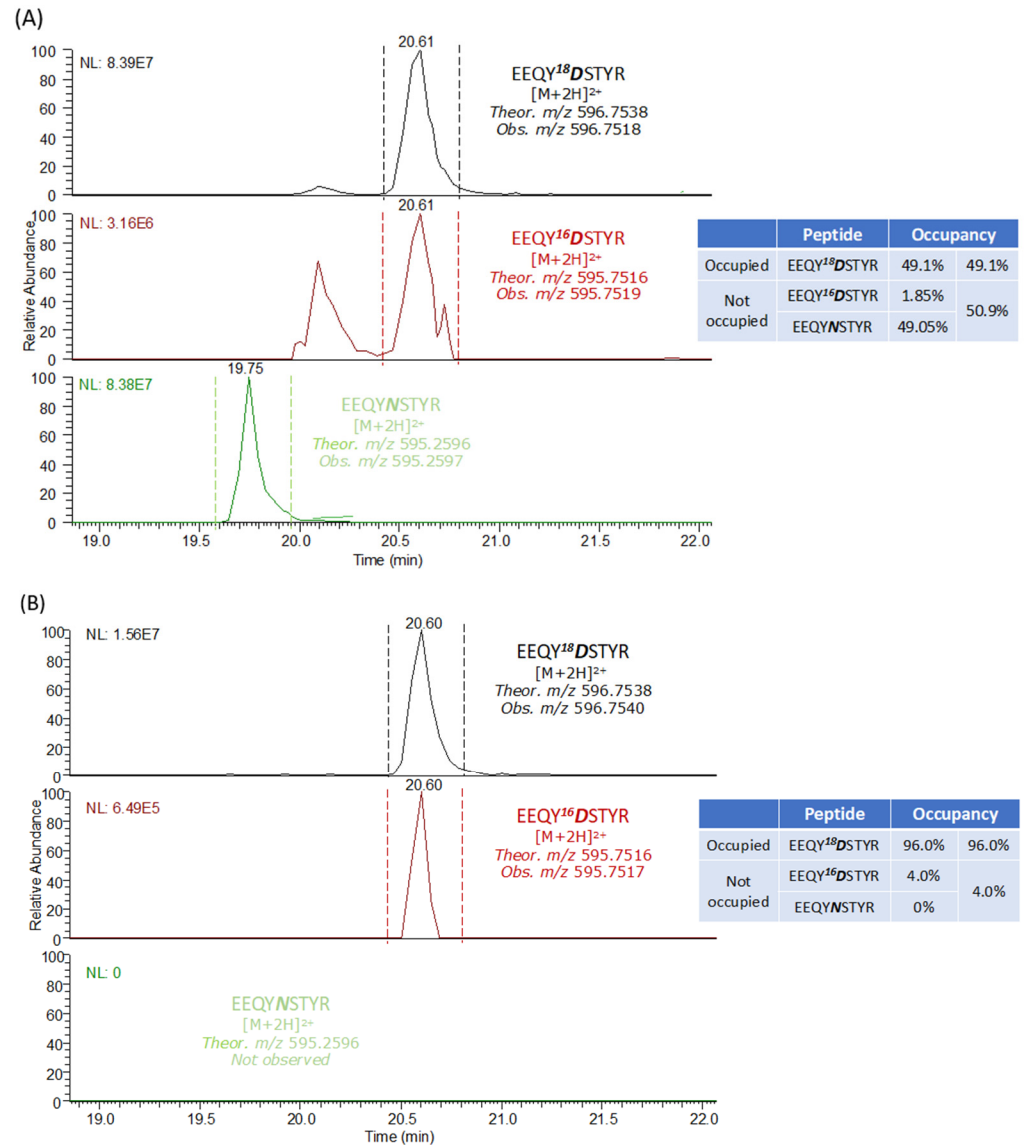

**Figure S1.** Mass spectrometric relative quantification of unmodified, deamidated, and deglycosylated peptides that contain the IgG Asn<sup>297</sup> potential *N*-glycosylation site, after PNGase glycan release in the presence of H<sub>2</sub><sup>18</sup>O, determined for (A) HCA-N and (B) HCA<sub>mRNA</sub>.

For each, the extracted ion chromatograms (EICs) of the unmodified asparagine (N) (lowest panel), the aspartic acid generated by deamidation (<sup>16</sup>D) (middle panel), and aspartic acid generated by PNGase-mediated glycosylation in the presence of H<sub>2</sub><sup>18</sup>O (<sup>18</sup>D) (upper panel) are shown. Only the occupied sites gain an <sup>18</sup>O label. All peptide assignments were confirmed based on charge state and peptide fragment ions in the corresponding MS2 spectrum.

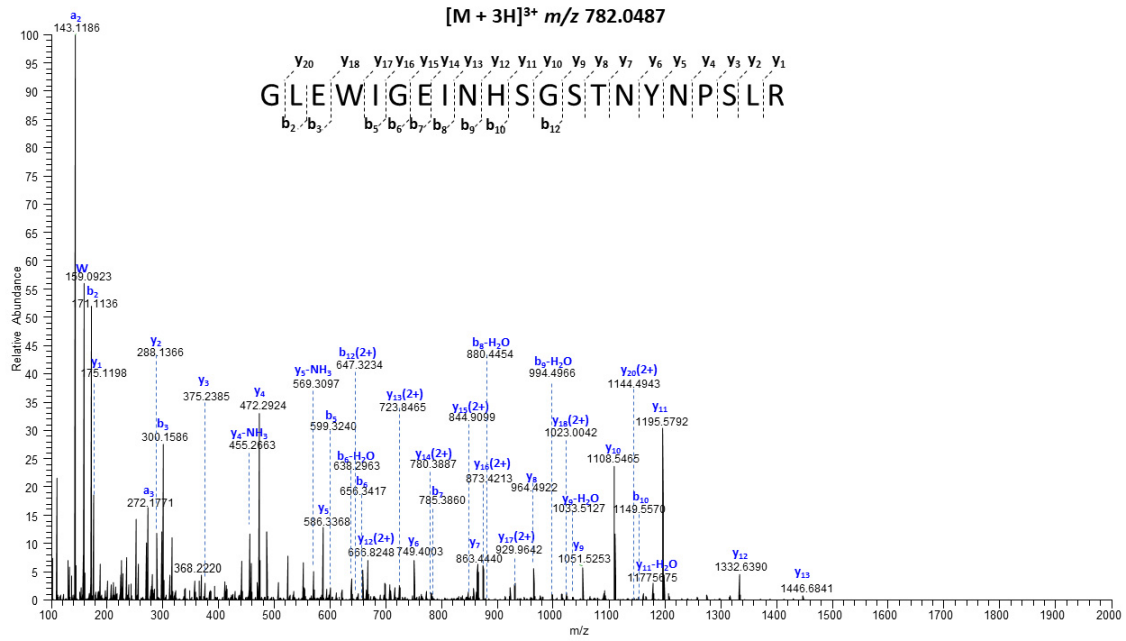

**Figure S2.** HCD tandem mass spectrum of the  $[M + 3H]^{3+}$  precursor ion at  $m/z$  782.0487,  $^{63}\text{GLEWIGEINHSGSTNYPNPSLR}^{83}$ , obtained from IgG HCA, corresponding to the tryptic peptide containing the unoccupied potential *N*-linked site at N<sup>71</sup> (NHS).

N<sup>75</sup> is not part of an NXS/T sequon and N<sup>77</sup> is not a potential glycosylation site, since Pro follows Asn. The blue letters are designations of the fragment ion types, as introduced by Domon & Costello [36] and now the system universally used for this purpose.
